# Supplementary material for: Facile Synthesis of FePS3 Nanosheets@MXene Composite as a High-Performance Anode Material for Sodium Storage
Source: PubMed Central journal article supplement (PMC7770659; doi:10.1007/s40820-020-0381-y), 2020-02-18
Supplement: 40820_2020_381_MOESM1_ESM.pdf [file 40820_2020_381_MOESM1_ESM.pdf]

Supporting Information for

## Facile Synthesis of FePS<sub>3</sub> Nanosheets@MXene Composite as a High-Performance Anode Material for Sodium Storage

Yonghao Ding<sup>1</sup>, Yu Chen<sup>1</sup>, Na Xu<sup>1</sup>, Xintong Lian<sup>1</sup>, Linlin Li<sup>1,\*</sup>, Yuxiang Hu<sup>2,\*</sup>, Shengjie Peng<sup>1,\*</sup>

<sup>1</sup>Jiangsu Key Laboratory of Materials and Technology for Energy Conversion, College of Materials Science and Technology, Nanjing University of Aeronautics and Astronautics, Nanjing 210016, People's Republic of China

<sup>2</sup>Nanomaterials Centre, School of Chemical Engineering and Australian Institute for Bioengineering and Nanotechnology, The University of Queensland, QLD 4072, Australia

\*Corresponding authors. E-mail: lilinlin@nuaa.edu.cn (Linlin Li); y.hu@uq.edu.au (Yuxiang Hu); pengshengjie@nuaa.edu.cn (Shengjie Peng)

### Supplementary Figures

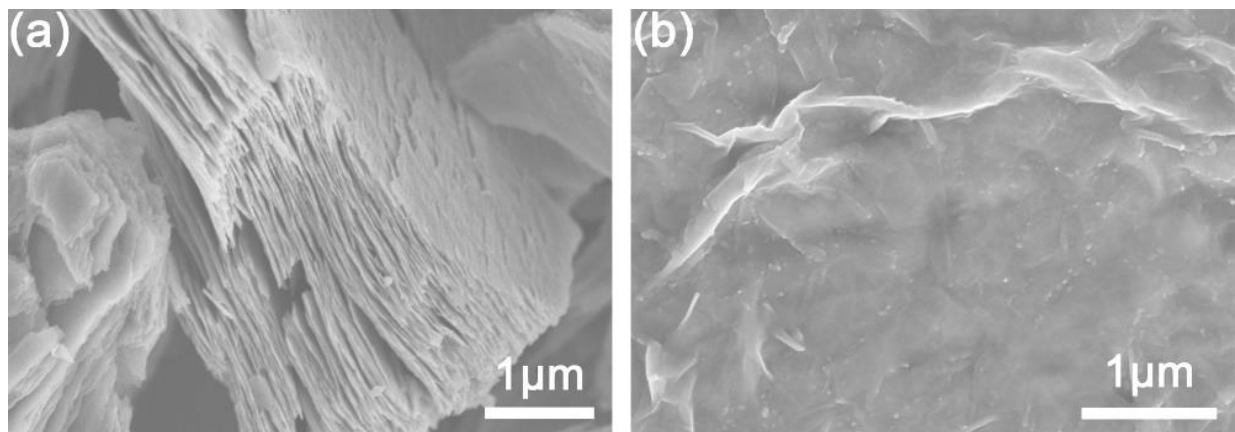

**Fig. S1** (a) SEM image of multilayered MXene. (b) SEM image of few-layered MXene

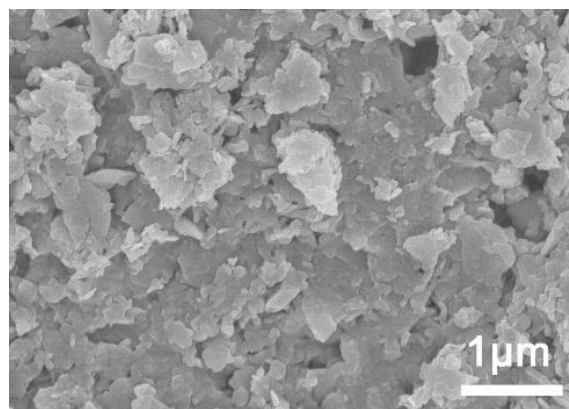

**Fig. S2** SEM image of FePS<sub>3</sub> nanosheets

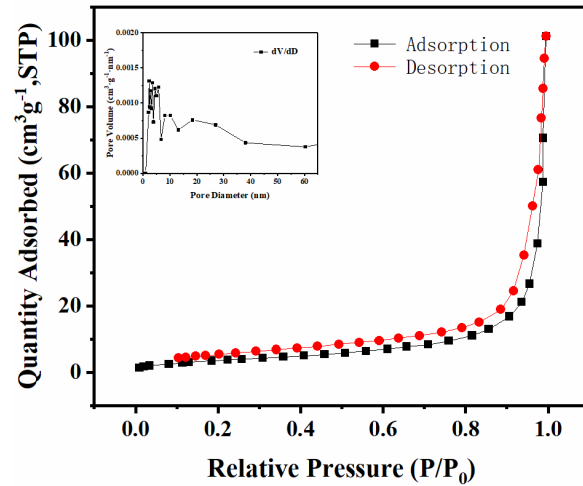

**Fig. S3** Typical nitrogen adsorption/desorption isotherms for FePS<sub>3</sub> nanosheets. The inset pictures show the pore size distribution calculated by the BJH formula

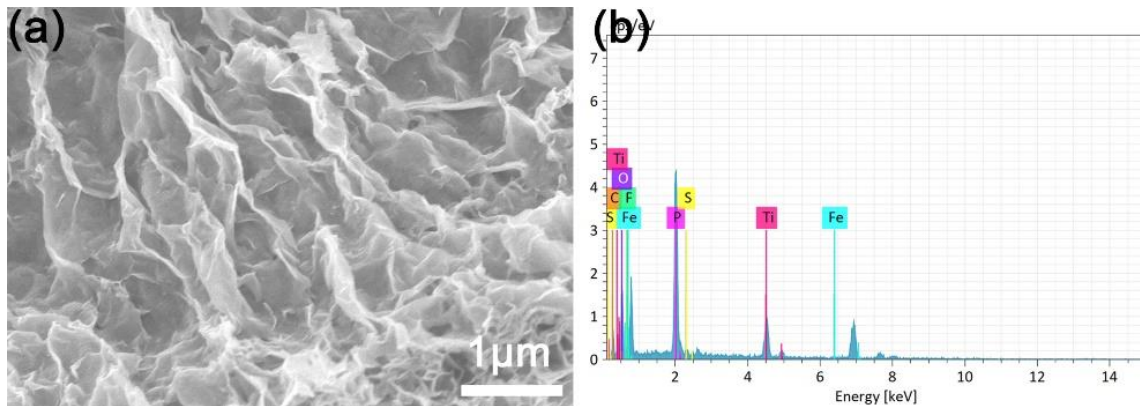

**Fig. S4** (a) SEM image of FePS<sub>3</sub>@MXene, (b) EDS image of FePS<sub>3</sub>@MXene

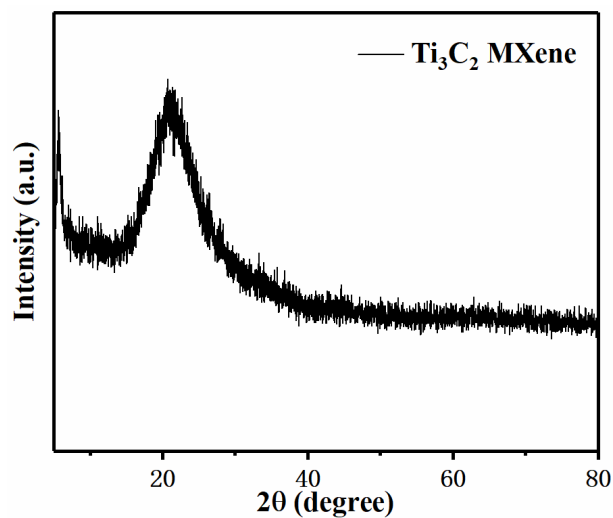

**Fig. S5** Powder X-ray diffraction (XRD) patterns of Ti<sub>3</sub>C<sub>2</sub> MXene

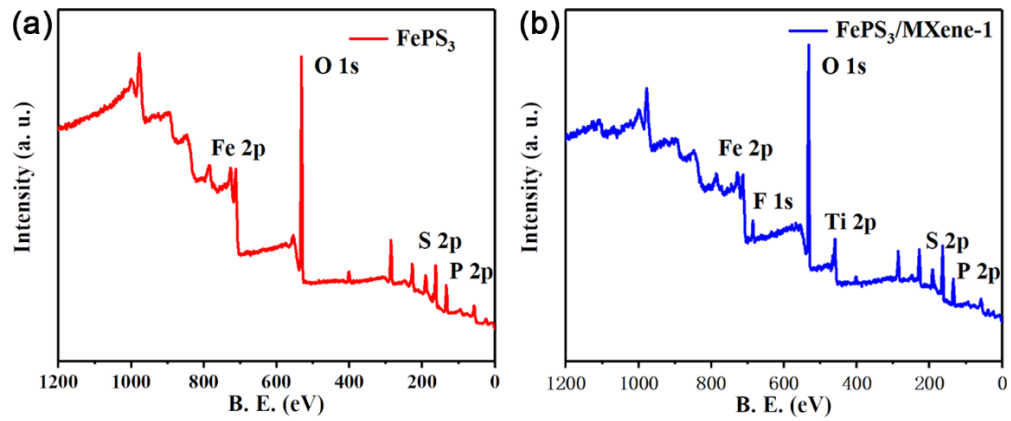

**Fig. S6** XPS survey spectrum of the as-prepared FePS<sub>3</sub> in the left and FePS<sub>3</sub>@MXene in the right

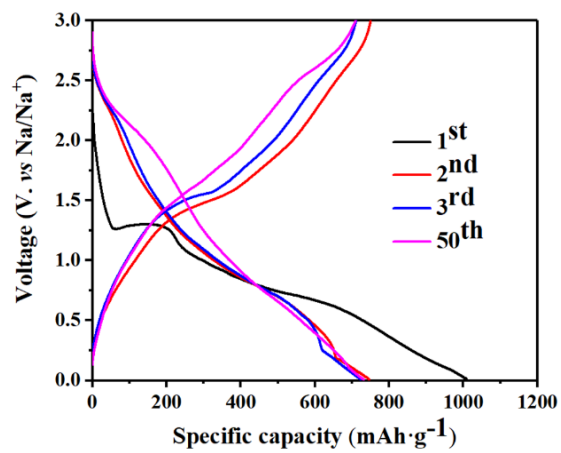

**Fig. S7** Charging and discharging curves at 0.1 A g<sup>-1</sup>

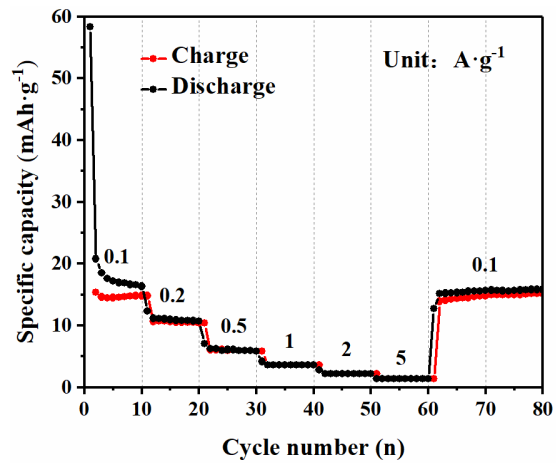

**Fig. S8** Rate capabilities of MXene

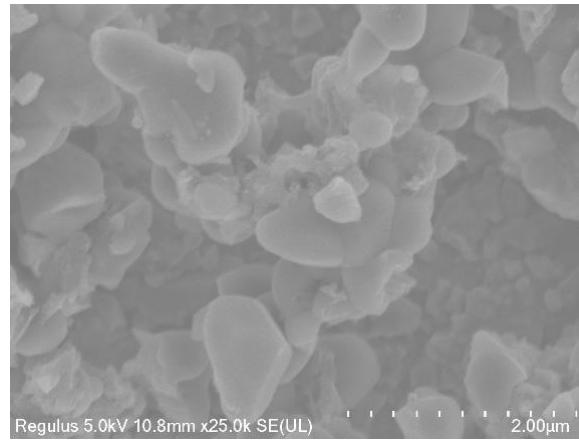

**Fig. S9** SEM image of  $\text{Na}_3\text{V}_2(\text{PO}_4)_3$

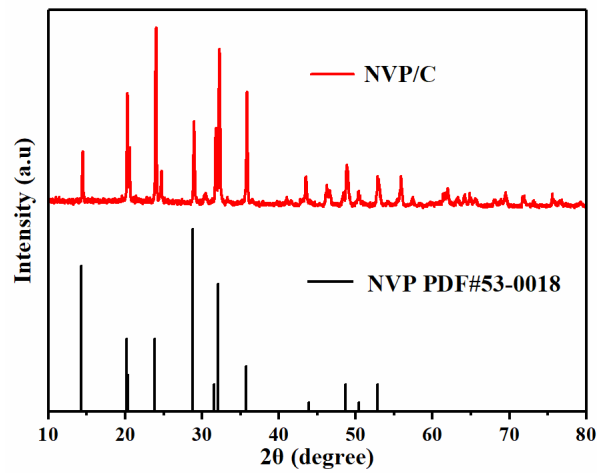

**Fig. S10** Powder X-ray diffraction (XRD) patterns of  $\text{Na}_3\text{V}_2(\text{PO}_4)_3$

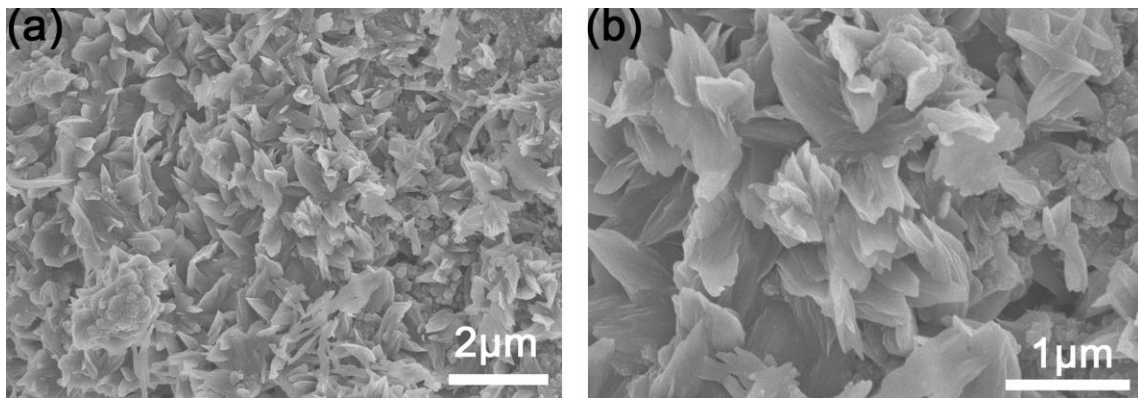

**Fig. S11** The SEM images of  $\text{FePS}_3@\text{MXene}$  after cycling

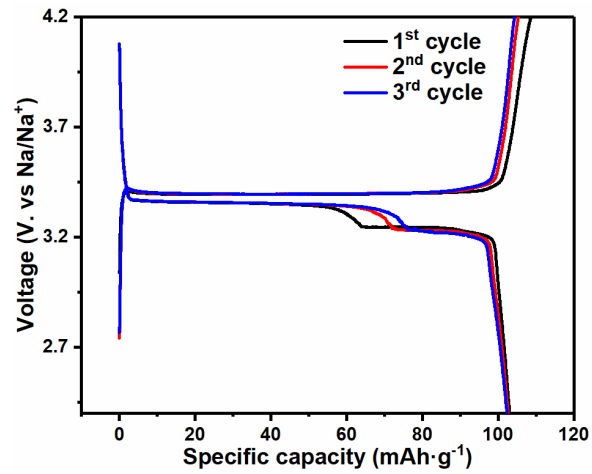

**Fig. S12** Charging and discharging curves of  $\text{Na}_3\text{V}_2(\text{PO}_4)_3/\text{C}$  cathode

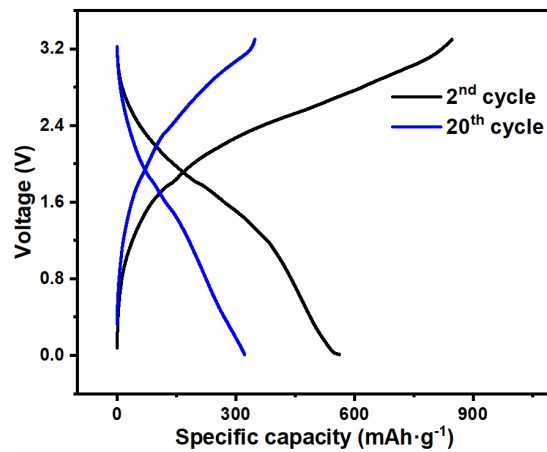

**Fig. S13** Charging and discharging curves of the full cell

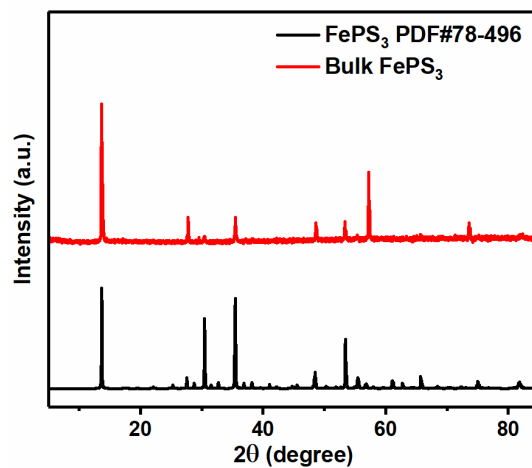

**Fig. S14** Powder X-ray diffraction (XRD) patterns of bulk  $\text{FePS}_3$  crystal
